# Supplementary material for: Whole-transcriptome analysis reveals mechanisms underlying antibacterial activity and biofilm inhibition by a malic acid combination (MAC) in Pseudomonas aeruginosa
Source: PeerJ journal article supplement (doi:10.7717/peerj.16476), 2023-12-07

A

## RIBOSOME

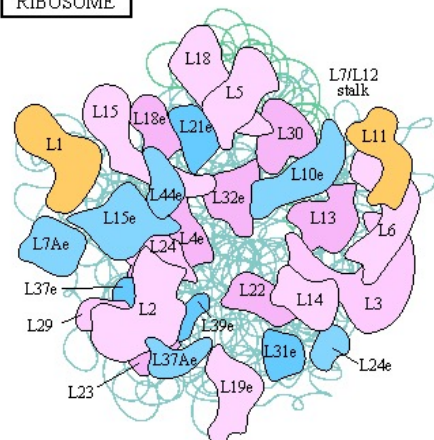Large subunit (*Haloarcula marismortui*)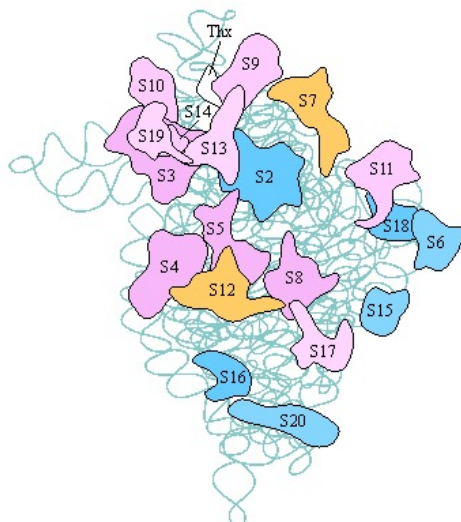Small subunit (*Thermus aquaticus*)

## Ribosomal RNAs

|                    |     |    |      |     |
|--------------------|-----|----|------|-----|
| Bacteria / Archaea | 23S | 5S |      | 16S |
| Eukaryotes         | 25S | 5S | 5.8S | 18S |

## Ribosomal proteins

|       |      |     |     |       |     |      |      |     |     |      |
|-------|------|-----|-----|-------|-----|------|------|-----|-----|------|
| EF-Tu | S10  | L3  | L4  | L23   | L2  | S19  | L22  | S3  | L16 | L29  |
|       | S20e | L3e | L4e | L23Ae | L8e | S15e | L17e | S3e |     | L35e |

|      |      |      |     |      |      |       |     |      |      |     |      |     |       |
|------|------|------|-----|------|------|-------|-----|------|------|-----|------|-----|-------|
| S17  | L14  | L24  | L5  | S14  | S8   | L6    | L18 | S5   | L30  | L15 | SecY |     |       |
| S11e | L23e | L26e | S4e | L11e | S29e | S15Ae | L9e | L32e | L19e | L5e | S2e  | L7e | L27Ae |

|     |      |      |      |      |      |      |       |      |
|-----|------|------|------|------|------|------|-------|------|
| IF1 | L36  | S13  | S11  | S4   | RpoA | L17  | L13   | S9   |
|     | L34e | L14e | S18e | S14e | S9e  | L18e | L13Ae | S16e |

|         |     |      |      |        |         |     |       |      |     |
|---------|-----|------|------|--------|---------|-----|-------|------|-----|
| EF-Tu,G | S7  | S12  | L7A  | RpoC,B | L7/L12  | L12 | L10   | L1   | L11 |
|         | S5e | S23e | L30e | L7Ae   | LP1,LP2 | LP0 | L10Ae | L12e |     |

|     |       |      |     |     |     |     |     |     |     |     |    |     |    |
|-----|-------|------|-----|-----|-----|-----|-----|-----|-----|-----|----|-----|----|
| S2  | EF-Ts | IF2  | S15 | IF3 | L37 | L20 | L34 | RF1 | L31 | L32 | L9 | S18 | S6 |
| S4e |       | S13e |     |     |     |     |     |     |     |     |    |     |    |

|     |     |     |     |          |     |     |    |     |     |     |
|-----|-----|-----|-----|----------|-----|-----|----|-----|-----|-----|
| L28 | L33 | L21 | L27 | FtsY,Ffh | S16 | L19 | S1 | S20 | S21 | L25 |
|-----|-----|-----|-----|----------|-----|-----|----|-----|-----|-----|

|      |      |      |      |      |      |       |      |       |      |      |      |      |
|------|------|------|------|------|------|-------|------|-------|------|------|------|------|
| L10e | L13e | L15e | L21e | L24e | L31e | L35Ae | L37e | L37Ae | L39e | L40e | L41e | L44e |
|------|------|------|------|------|------|-------|------|-------|------|------|------|------|

|      |     |     |      |      |      |      |      |      |       |      |      |    |
|------|-----|-----|------|------|------|------|------|------|-------|------|------|----|
| S3Ae | S6e | S8e | S17e | S19e | S24e | S25e | S26e | S27e | S27Ae | S28e | S30e | LX |
|------|-----|-----|------|------|------|------|------|------|-------|------|------|----|

|     |       |      |      |      |      |      |      |
|-----|-------|------|------|------|------|------|------|
| L6e | L18Ae | L22e | L27e | L28e | L29e | L36e | L38e |
|-----|-------|------|------|------|------|------|------|

|     |      |      |      |
|-----|------|------|------|
| S7e | S10e | S12e | S21e |
|-----|------|------|------|

B

## AMINOACYL-tRNA BIOSYNTHESIS

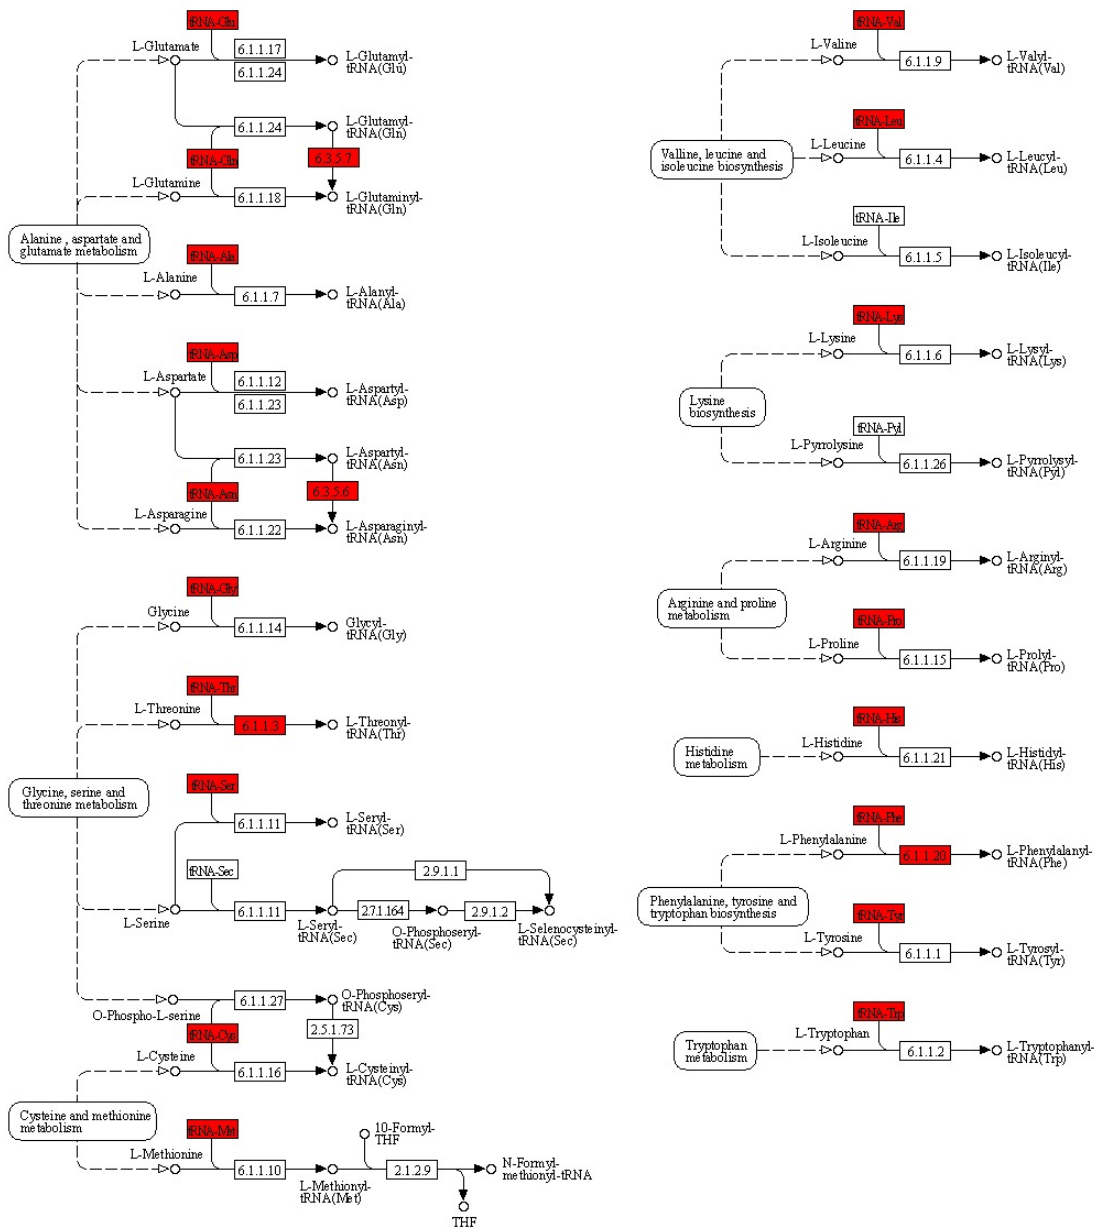

Supplement: Figure_S9.pdf [file Figure_S9.pdf]
