# Supplementary material for: Whole-transcriptome analysis reveals mechanisms underlying antibacterial activity and biofilm inhibition by a malic acid combination (MAC) in Pseudomonas aeruginosa
Source: PeerJ journal article supplement (doi:10.7717/peerj.16476), 2023-12-07

**A**

PCA plot

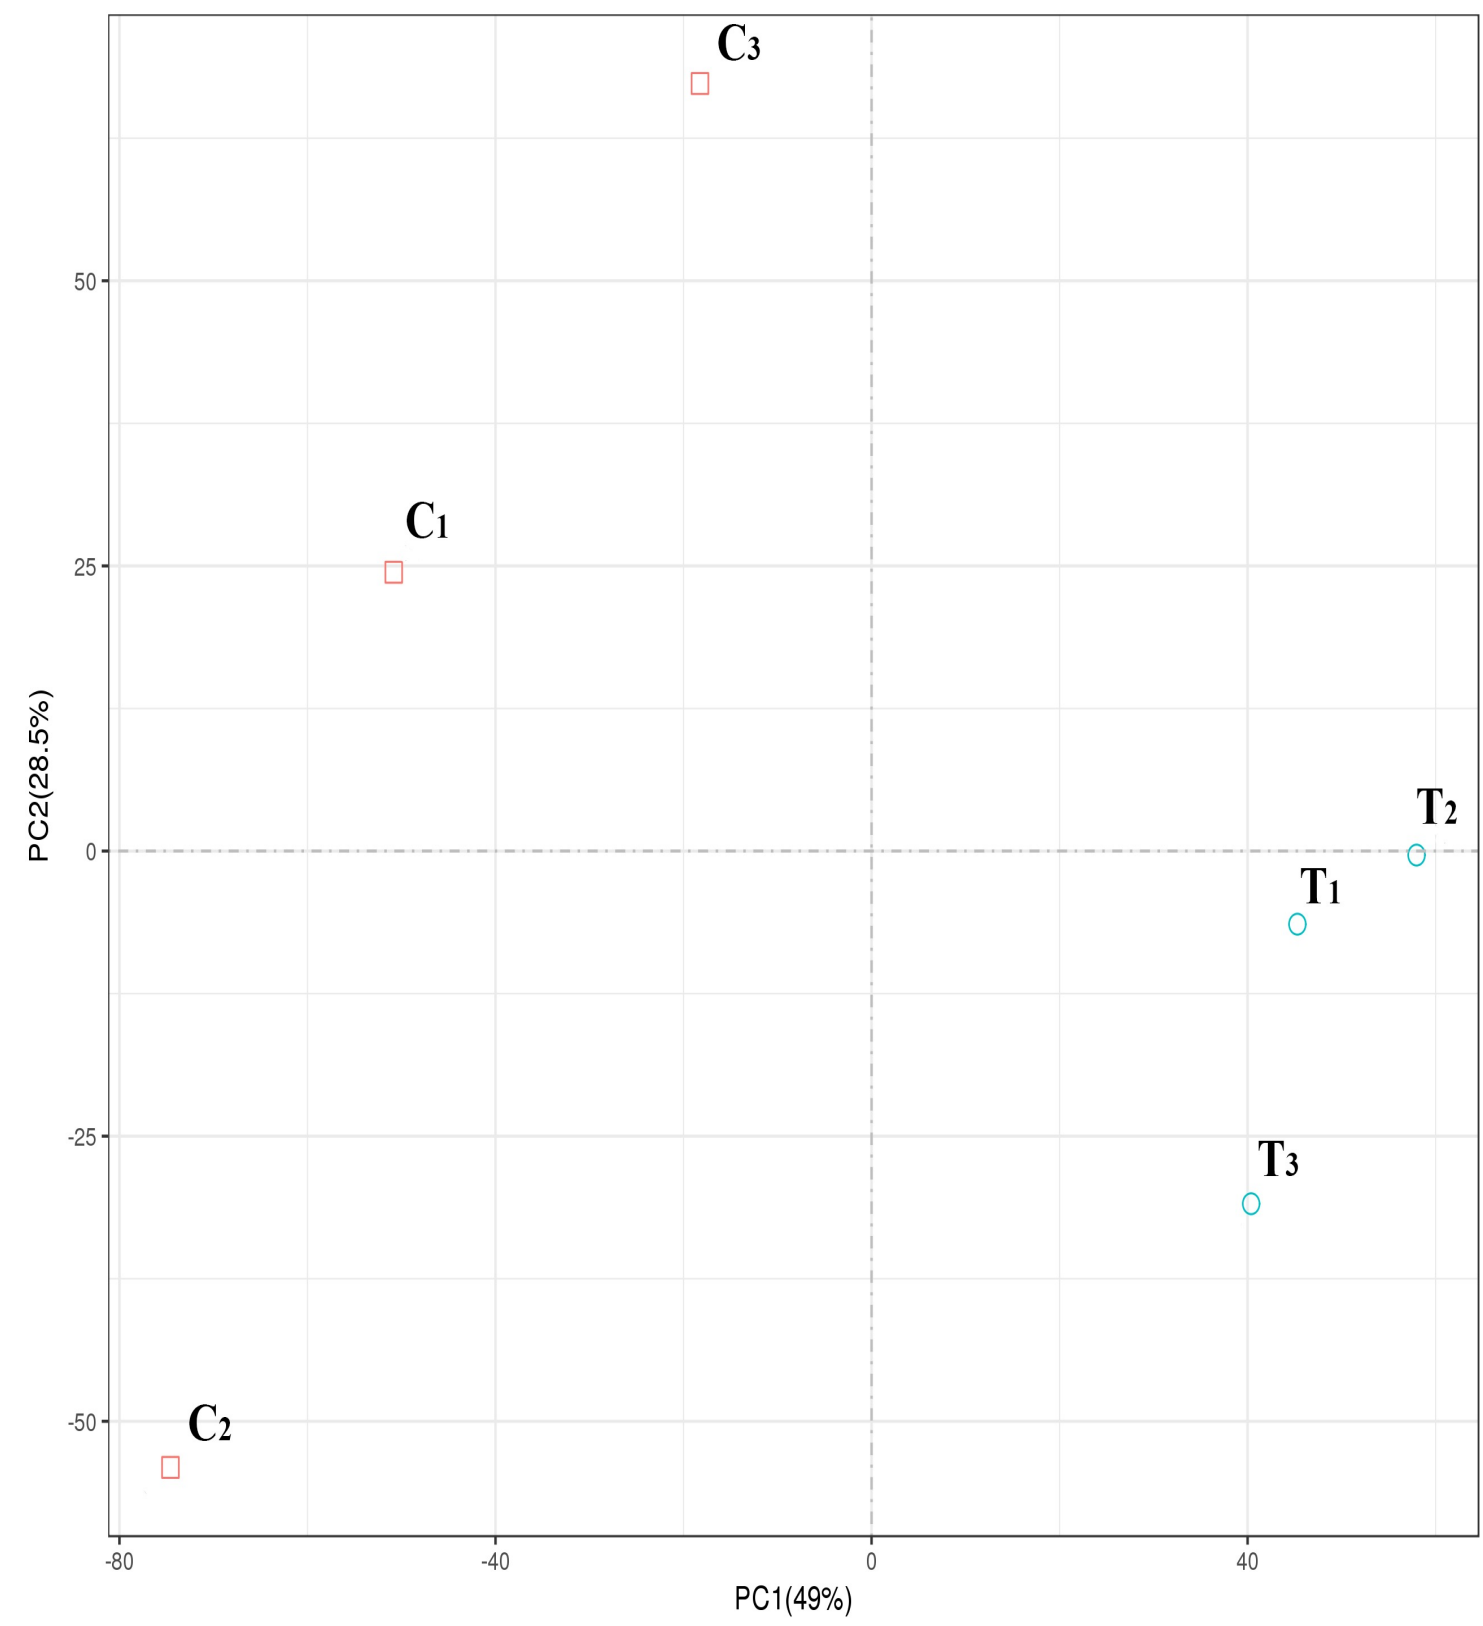**B**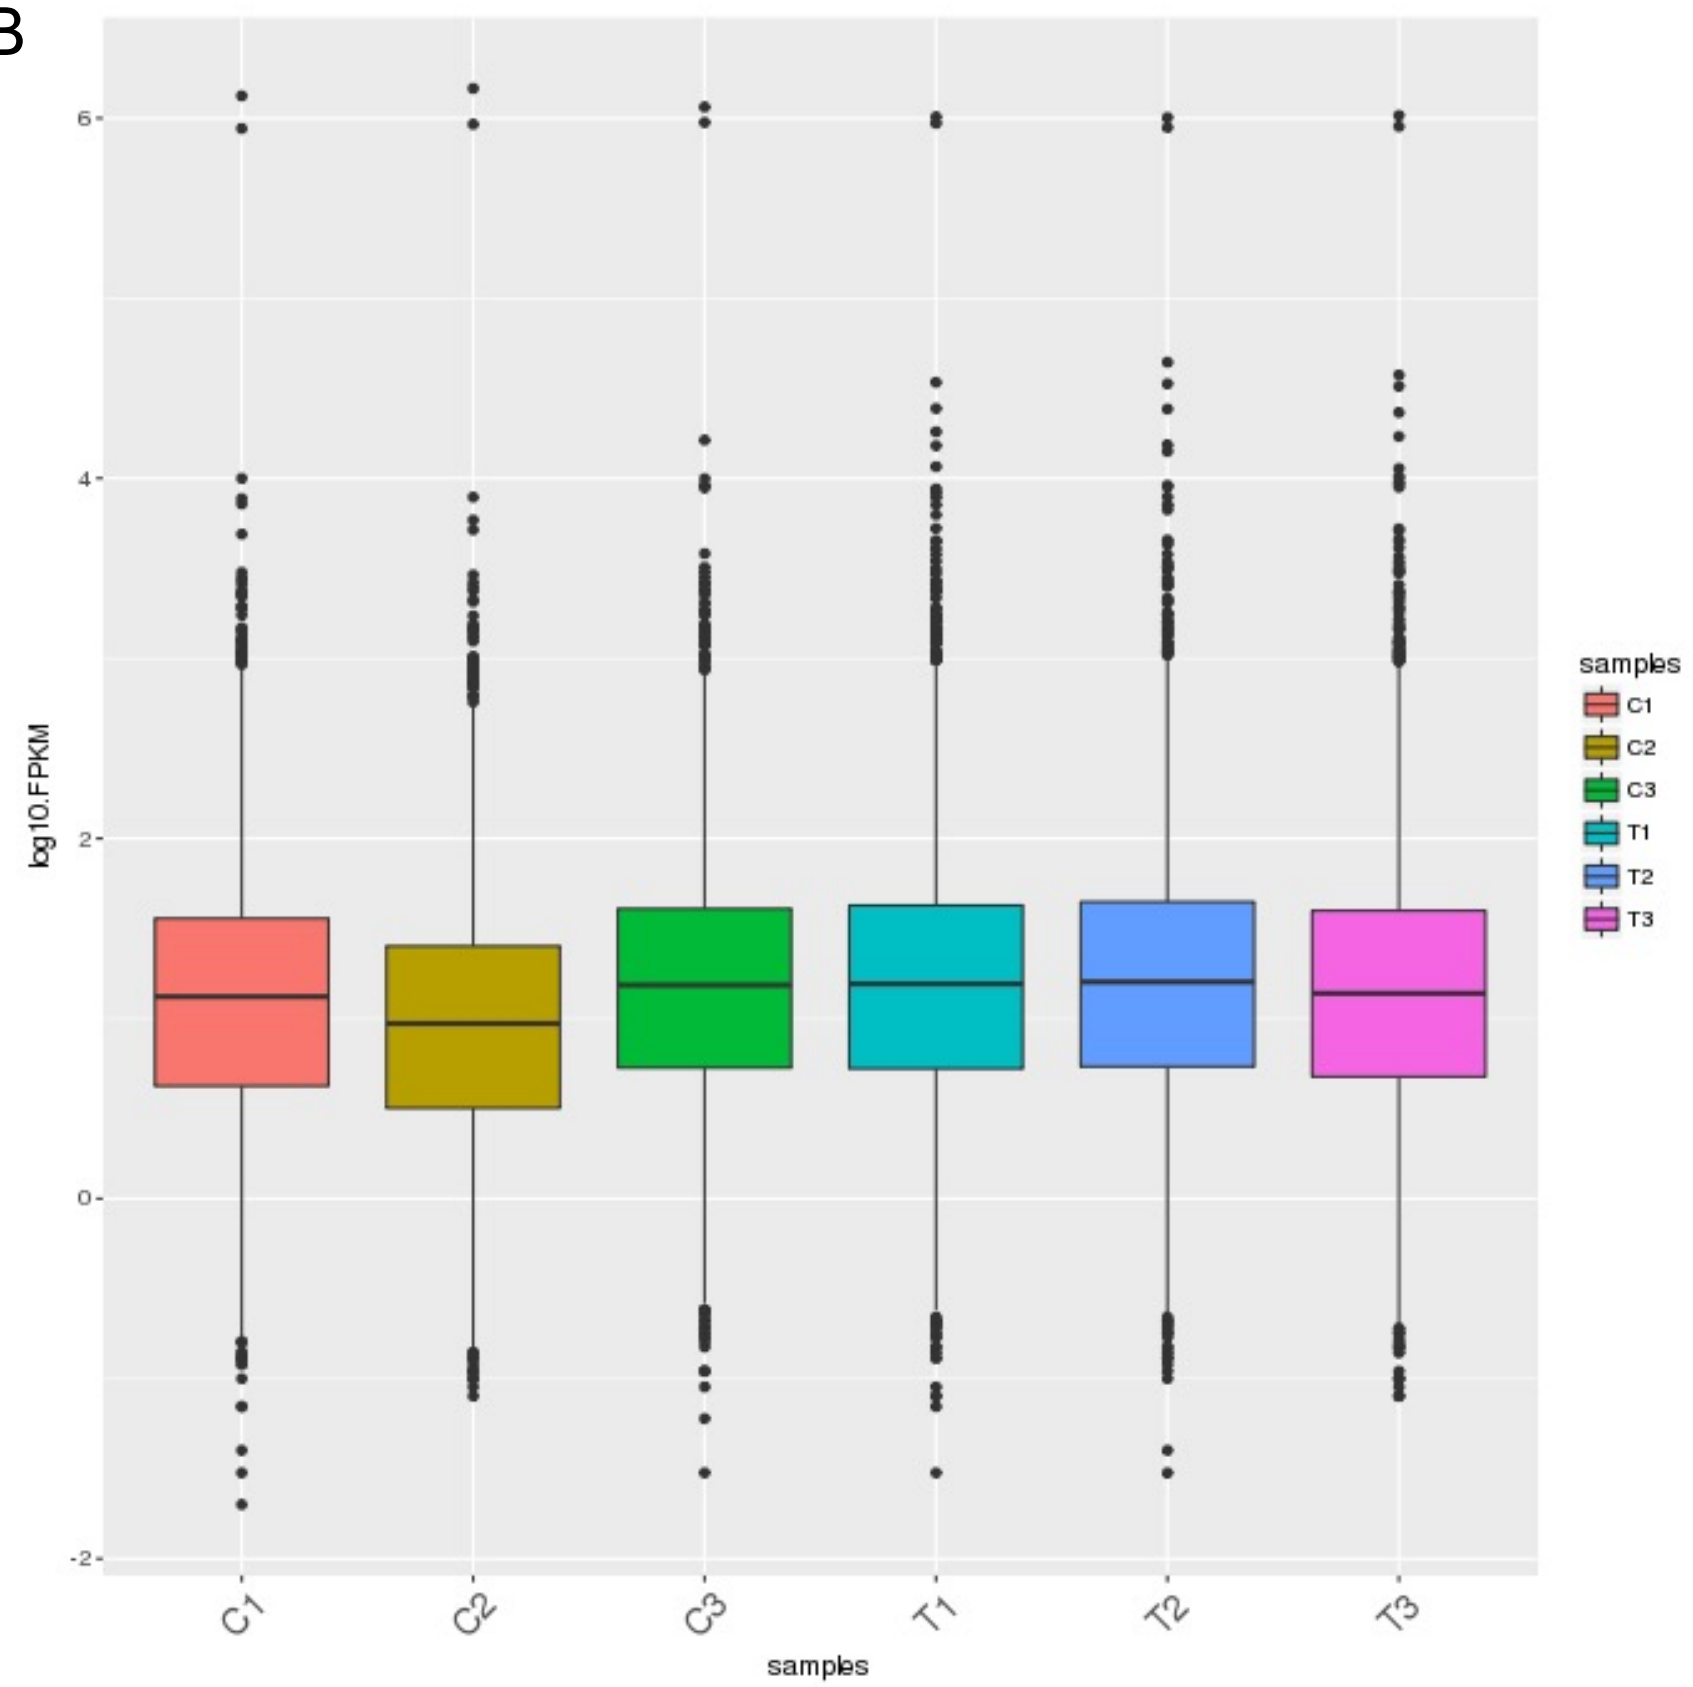

Supplement: Figure_S2.pdf [file Figure_S2.pdf]
