# Supplementary material for: Whole-transcriptome analysis reveals mechanisms underlying antibacterial activity and biofilm inhibition by a malic acid combination (MAC) in Pseudomonas aeruginosa
Source: PeerJ journal article supplement (doi:10.7717/peerj.16476), 2023-12-07

**A**

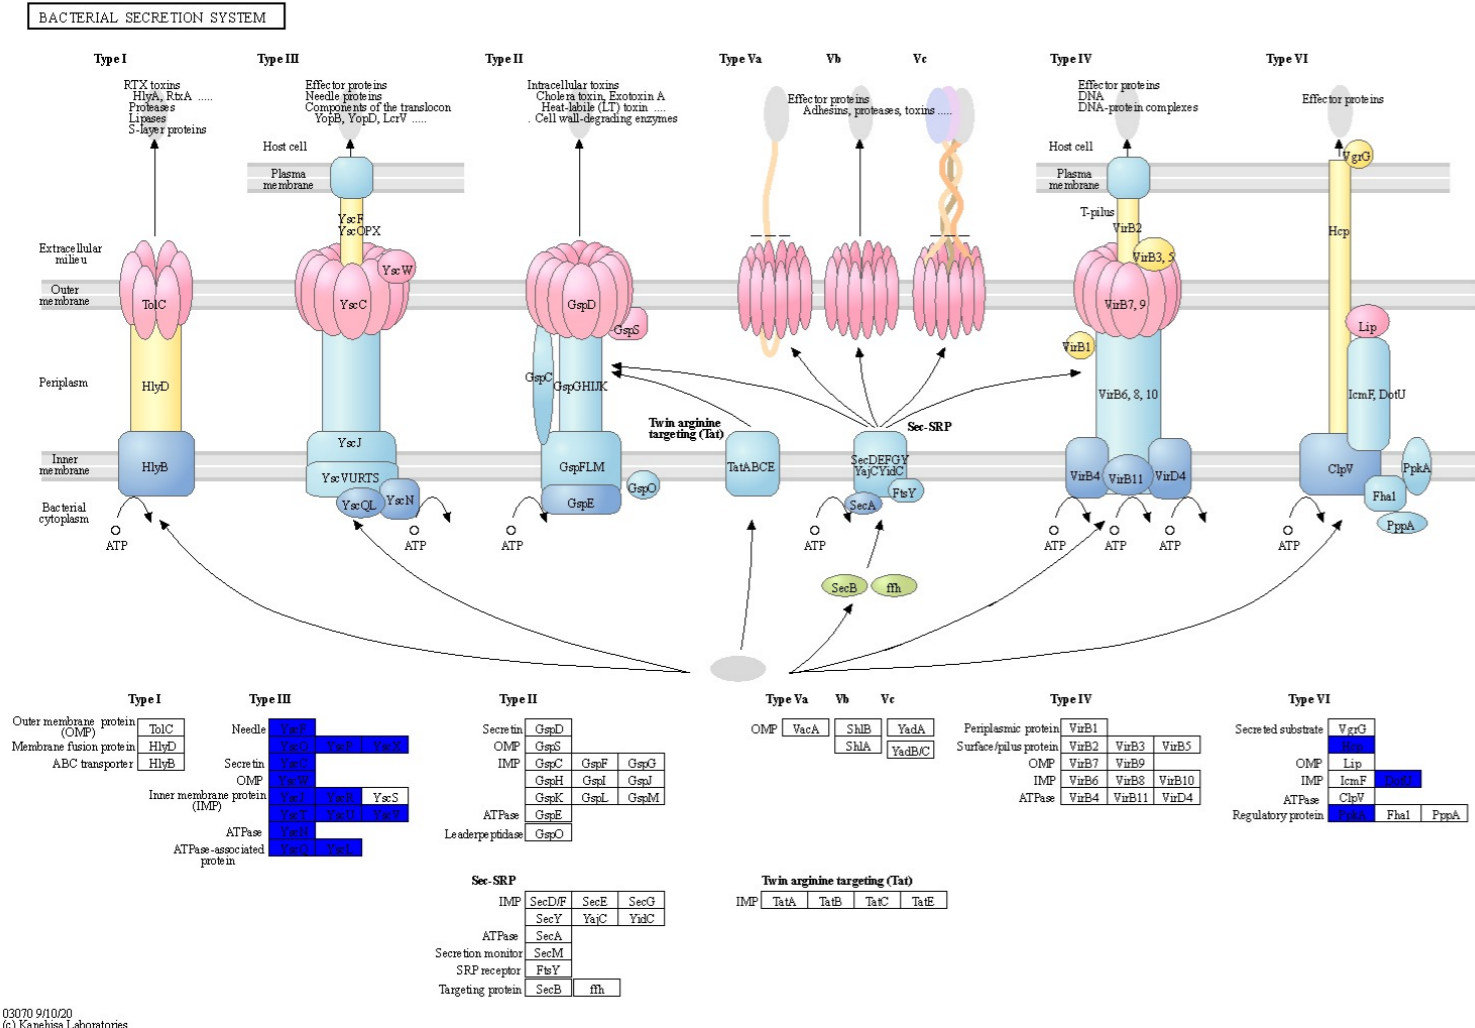

**B**

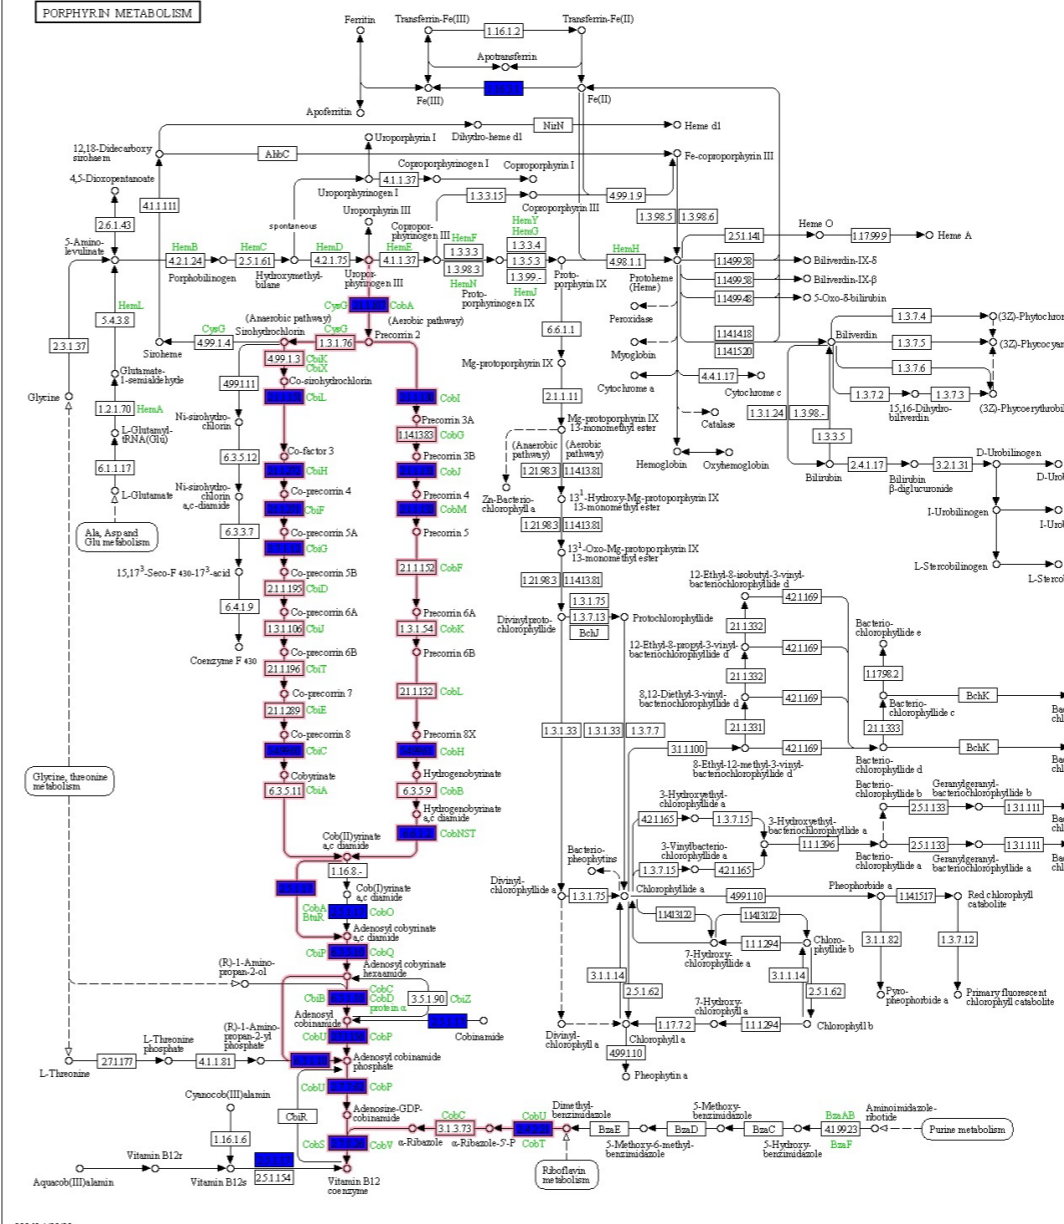

**C**

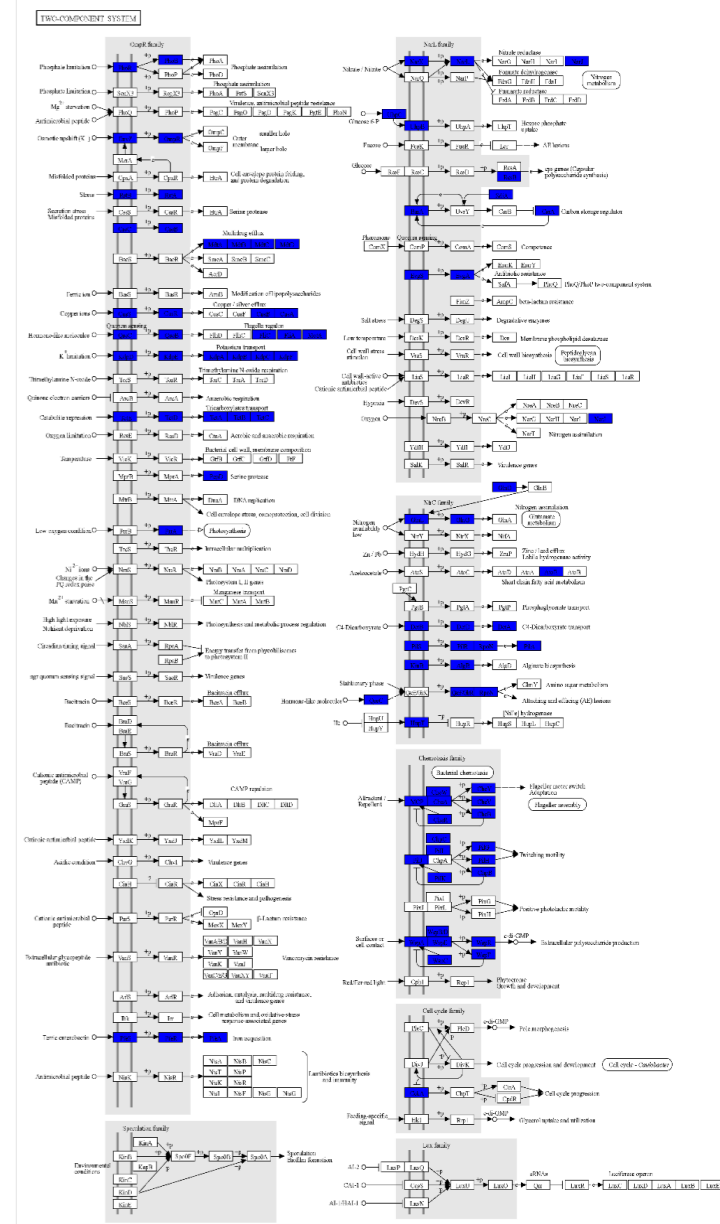

Supplement: Figure_S10.pdf [file Figure_S10.pdf]
